# Supplementary material for: Food availability before aestivation governs growth and winter reproductive potential in the capital breeding fish, Ammodytes japonicus
Source: PLoS One. 2019 Mar 7;14(3):e0213611. doi: 10.1371/journal.pone.0213611 (PMC6405122; doi:10.1371/journal.pone.0213611)
Supplement: S1 Dataset — (XLSX) [file pone.0213611.s001.xlsx]

## Sheet: S1
S1 Table. Raw data of western sand lance in Experiment I.
Date	Group	Tank	State	No	SL	BW	K
2016-04-28	Start	start	Swim	1	62.5	0.82	3.35872
2016-04-28	Start	start	Swim	2	57.2	0.66	3.5266
2016-04-28	Start	start	Swim	3	68.2	0.91	2.86872
2016-04-28	Start	start	Swim	4	78.2	1.62	3.38762
2016-04-28	Start	start	Swim	5	78.7	1.38	2.8311
2016-04-28	Start	start	Swim	6	75.1	1.58	3.73024
2016-04-28	Start	start	Swim	7	69.6	1.13	3.35159
2016-04-28	Start	start	Swim	8	85.9	1.83	2.88716
2016-04-28	Start	start	Swim	9	68.5	0.98	3.04898
2016-04-28	Start	start	Swim	10	67.1	0.88	2.91283
2016-04-28	Start	start	Swim	11	73.8	1.05	2.61228
2016-04-28	Start	start	Swim	12	60.3	0.59	2.69092
2016-04-28	Start	start	Swim	13	87.4	2.25	3.37014
2016-04-28	Start	start	Swim	14	64.7	0.94	3.47068
2016-04-28	Start	start	Swim	15	65.3	0.85	3.05267
2016-04-28	Start	start	Swim	16	79.2	1.75	3.52259
2016-04-28	Start	start	Swim	17	66.5	0.57	1.93825
2016-04-28	Start	start	Swim	18	82.8	1.95	3.43513
2016-04-28	Start	start	Swim	19	68.9	0.87	2.65988
2016-04-28	Start	start	Swim	20	83.4	1.77	3.05123
2016-04-28	Start	start	Swim	21	61.8	0.8	3.38941
2016-04-28	Start	start	Swim	22	73	1.35	3.47029
2016-04-28	Start	start	Swim	23	65.3	0.78	2.80127
2016-04-28	Start	start	Swim	24	81.3	1.83	3.40549
2016-04-28	Start	start	Swim	25	61.8	0.72	3.05047
2016-04-28	Start	start	Swim	26	77.5	1.34	2.87872
2016-04-28	Start	start	Swim	27	63.4	0.69	2.70758
2016-04-28	Start	start	Swim	28	83.4	1.86	3.20638
2016-04-28	Start	start	Swim	29	61.3	0.57	2.47453
2016-04-28	Start	start	Swim	30	82.6	1.88	3.33594
2016-04-28	Start	start	Swim	31	59.1	0.6	2.90662
2016-04-28	Start	start	Swim	32	80.8	1.62	3.07101
2016-04-28	Start	start	Swim	33	65.2	0.89	3.21105
2016-04-28	Start	start	Swim	34	85.3	1.79	2.88407
2016-04-28	Start	start	Swim	35	64	0.59	2.25067
2016-04-28	Start	start	Swim	36	73.9	1.42	3.51848
2016-04-28	Start	start	Swim	37	70.7	1.08	3.05609
2016-04-28	Start	start	Swim	38	81.9	1.7	3.09455
2016-04-28	Start	start	Swim	39	69	0.96	2.92229
2016-04-28	Start	start	Swim	40	86.1	2.02	3.16477
2016-04-28	Start	start	Swim	41	64.5	0.86	3.20494
2016-04-28	Start	start	Swim	42	80.1	1.75	3.40518
2016-04-28	Start	start	Swim	43	66.5	1.07	3.63847
2016-04-28	Start	start	Swim	44	79.2	1.64	3.30117
2016-04-28	Start	start	Swim	45	63.4	0.73	2.86454
2016-04-28	Start	start	Swim	46	73.1	1.35	3.45606
2016-04-28	Start	start	Swim	47	63	0.67	2.6795
2016-04-28	Start	start	Swim	48	80.6	1.69	3.22761
2016-04-28	Start	start	Swim	49	63.9	0.76	2.9128
2016-04-28	Start	start	Swim	50	80.2	1.71	3.31492
2016-04-28	Start	start	Swim	51	72.2	1.23	3.26809
2016-04-28	Start	start	Swim	52	69.1	0.84	2.54592
2016-04-28	Start	start	Swim	53	69.7	1.04	3.07139
2016-04-28	Start	start	Swim	54	73.6	1.43	3.58676
2016-04-28	Start	start	Swim	55	69.5	1.12	3.33629
2016-04-28	Start	start	Swim	56	68.5	1.25	3.889
2016-04-28	Start	start	Swim	57	59.4	0.71	3.38765
2016-04-28	Start	start	Swim	58	69.1	1.1	3.33395
2016-04-28	Start	start	Swim	59	69.1	1.07	3.24302
2016-04-28	Start	start	Swim	60	67	1.17	3.89011
2016-04-28	Start	start	Swim	61	70.3	1.19	3.42516
2016-04-28	Start	start	Swim	62	65.9	1.01	3.52911
2016-04-28	Start	start	Swim	63	62	0.66	2.76929
2016-04-28	Start	start	Swim	64	66.7	0.99	3.33624
2016-04-28	Start	start	Swim	65	75.5	1.45	3.3692
2016-04-28	Start	start	Swim	66	73.2	1.43	3.64588
2016-04-28	Start	start	Swim	67	73.9	1.29	3.19637
2016-04-28	Start	start	Swim	68	62.9	0.89	3.57633
2016-04-28	Start	start	Swim	69	66.3	0.88	3.01955
2016-04-28	Start	start	Swim	70	74.4	1.27	3.08379
2016-04-28	Start	start	Swim	71	71.3	1.26	3.47618
2016-04-28	Start	start	Swim	72	67.4	0.99	3.23337
2016-04-28	Start	start	Swim	73	72.1	1.18	3.1483
2016-04-28	Start	start	Swim	74	73.9	1.08	2.67603
2016-04-28	Start	start	Swim	75	68.8	1.09	3.34704
2016-04-28	Start	start	Swim	76	66.3	0.93	3.19111
2016-04-28	Start	start	Swim	77	67	0.94	3.12538
2016-04-28	Start	start	Swim	78	71.5	1.27	3.47445
2016-04-28	Start	start	Swim	79	71.4	1.35	3.70885
2016-04-28	Start	start	Swim	80	67.5	1.05	3.41411
2016-04-28	Start	start	Swim	81	72.7	1.1	2.86279
2016-04-28	Start	start	Swim	82	75.1	1.3	3.06919
2016-04-28	Start	start	Swim	83	66.9	0.99	3.30641
2016-04-28	Start	start	Swim	84	68	1.09	3.46657
2016-04-28	Start	start	Swim	85	72.9	1.24	3.20066
2016-04-28	Start	start	Swim	86	67.7	0.79	2.54602
2016-04-28	Start	start	Swim	87	66.8	0.98	3.28773
2016-04-28	Start	start	Swim	88	61.7	0.56	2.38414
2016-04-28	Start	start	Swim	89	59.6	0.72	3.4009
2016-04-28	Start	start	Swim	90	68.6	1.06	3.28347
2016-04-28	Start	start	Swim	91	71.7	1.22	3.3098
2016-04-28	Start	start	Swim	92	68.5	0.94	2.92453
2016-04-28	Start	start	Swim	93	83.3	1.77	3.06223
2016-04-28	Start	start	Swim	94	81.3	1.73	3.2194
2016-04-28	Start	start	Swim	95	66.6	1.06	3.58825
2016-04-28	Start	start	Swim	96	71.5	1.23	3.36501
2016-04-28	Start	start	Swim	97	69.5	1.22	3.63417
2016-04-28	Start	start	Swim	98	69.8	1.14	3.35227
2016-04-28	Start	start	Swim	99	64.9	1.04	3.80451
2016-04-28	Start	start	Swim	100	64.6	0.91	3.37554
2016-04-28	Start	start	Swim	101	74.9	1.33	3.16524
2016-04-28	Start	start	Swim	102	65.1	0.95	3.44335
2016-04-28	Start	start	Swim	103	65.9	1.03	3.59899
2016-04-28	Start	start	Swim	104	65.9	0.96	3.3544
2016-04-28	Start	start	Swim	105	78.7	1.72	3.52861
2016-04-28	Start	start	Swim	106	70.3	1.24	3.56908
2016-04-28	Start	start	Swim	107	72.8	1.38	3.57672
2016-04-28	Start	start	Swim	108	76.5	1.3	2.90375
2016-04-28	Start	start	Swim	109	72.1	1.18	3.1483
2016-04-28	Start	start	Swim	110	72.9	1.28	3.3039
2016-04-28	Start	start	Swim	111	73.1	1.09	2.79045
2016-04-28	Start	start	Swim	112	70.1	1.27	3.6868
2016-04-28	Start	start	Swim	113	64	0.77	2.93732
2016-04-28	Start	start	Swim	114	68	0.91	2.89411
2016-04-28	Start	start	Swim	115	72.3	1.25	3.30746
2016-05-19	HR	T1	Swim	1	74.6	1.94	4.67289
2016-05-19	HR	T1	Swim	2	72.5	1.4	3.67379
2016-05-19	HR	T1	Swim	3	71.8	1.01	2.72865
2016-05-19	HR	T1	Swim	4	78.1	1.91	4.00941
2016-05-19	HR	T1	Swim	5	75.8	1.34	3.07679
2016-05-19	HR	T1	Swim	6	69.7	1.38	4.0755
2016-05-19	HR	T1	Swim	7	65.8	1.01	3.54522
2016-05-19	HR	T1	Swim	8	80.6	2.11	4.02974
2016-05-19	HR	T1	Swim	9	74.7	1.58	3.79049
2016-05-19	HR	T1	Swim	10	68.9	1.13	3.45478
2016-05-19	HR	T2	Swim	1	74.3	1.62	3.94956
2016-05-19	HR	T2	Swim	2	84	2.77	4.6735
2016-05-19	HR	T2	Swim	3	83.6	2.3	3.93649
2016-05-19	HR	T2	Swim	4	78.5	2.06	4.25852
2016-05-19	HR	T2	Swim	5	88.2	2.81	4.09544
2016-05-19	HR	T2	Swim	6	78.2	1.89	3.95222
2016-05-19	HR	T2	Swim	7	66.5	1.14	3.8765
2016-05-19	HR	T2	Swim	8	72.6	1.51	3.94609
2016-05-19	HR	T2	Swim	9	69.8	1.33	3.91098
2016-05-19	HR	T3	Swim	1	75	1.64	3.88741
2016-05-19	HR	T3	Swim	2	92.2	3.27	4.1721
2016-05-19	HR	T3	Swim	3	81.8	2.58	4.71368
2016-05-19	HR	T3	Swim	4	84.8	2.71	4.44408
2016-05-19	HR	T3	Swim	5	84.5	2.38	3.94464
2016-05-19	HR	T3	Swim	6	79.6	2.23	4.42146
2016-05-19	HR	T3	Swim	7	71.5	1.39	3.80274
2016-05-19	HR	T3	Swim	8	83.1	2.56	4.46105
2016-05-19	HR	T3	Swim	9	76.5	1.78	3.9759
2016-05-19	HR	T3	Swim	10	82.8	2.4	4.22786
2016-05-19	LR	T4	Swim	1	70.3	1.22	3.51151
2016-05-19	LR	T4	Swim	2	78.4	1.46	3.02974
2016-05-19	LR	T4	Swim	3	80.8	1.95	3.69658
2016-05-19	LR	T4	Swim	4	75.4	1.67	3.89585
2016-05-19	LR	T4	Swim	5	67.5	0.92	2.99141
2016-05-19	LR	T4	Swim	6	72.1	1.32	3.52183
2016-05-19	LR	T4	Swim	7	71.6	1.29	3.5144
2016-05-19	LR	T4	Swim	8	75.6	1.52	3.51786
2016-05-19	LR	T4	Swim	9	71.1	1.19	3.31084
2016-05-19	LR	T4	Swim	10	70.6	1.27	3.60902
2016-05-19	LR	T4	Swim	11	55	0.39	2.3441
2016-05-19	LR	T5	Swim	1	75.8	1.53	3.51305
2016-05-19	LR	T5	Swim	2	91.8	2.75	3.55471
2016-05-19	LR	T5	Swim	3	83.9	1.98	3.35258
2016-05-19	LR	T5	Swim	4	83	1.86	3.25296
2016-05-19	LR	T5	Swim	5	80.5	1.36	2.60706
2016-05-19	LR	T5	Swim	6	65.9	0.98	3.42428
2016-05-19	LR	T5	Swim	7	72.3	1.44	3.8102
2016-05-19	LR	T5	Swim	8	74.9	1.53	3.64121
2016-05-19	LR	T5	Swim	9	72.1	1.39	3.70859
2016-05-19	LR	T5	Swim	10	66.7	0.66	2.22416
2016-05-19	LR	T6	Swim	1	75.3	1.66	3.88797
2016-05-19	LR	T6	Swim	2	84.3	2.41	4.02285
2016-05-19	LR	T6	Swim	3	75.7	1.61	3.7114
2016-05-19	LR	T6	Swim	4	72.9	1.47	3.79433
2016-05-19	LR	T6	Swim	5	73.4	1.17	2.95868
2016-05-19	LR	T6	Swim	6	73.4	1.54	3.89433
2016-05-19	LR	T6	Swim	7	71.7	1.36	3.68962
2016-05-19	LR	T6	Swim	8	79.1	1.57	3.17227
2016-05-19	LR	T6	Swim	9	66.7	1.19	4.01023
2016-05-19	LR	T6	Swim	10	68	0.91	2.89411
2016-06-09	HR	T1	Swim	1	73.6	1.96	4.91612
2016-06-09	HR	T1	Swim	2	78.4	2.09	4.33709
2016-06-09	HR	T1	Swim	3	76.1	2.13	4.8331
2016-06-09	HR	T1	Swim	4	72	1.31	3.50973
2016-06-09	HR	T1	Swim	5	83.7	2.72	4.63866
2016-06-09	HR	T1	Swim	6	80.5	2.05	3.92976
2016-06-09	HR	T1	Swim	7	95.2	3.55	4.1145
2016-06-09	HR	T1	Swim	8	70.3	1.52	4.375
2016-06-09	HR	T2	Swim	1	84.1	2.7	4.53916
2016-06-09	HR	T2	Swim	2	77.1	1.79	3.90562
2016-06-09	HR	T2	Swim	3	86.8	2.88	4.40386
2016-06-09	HR	T2	Swim	4	83.2	2.66	4.61861
2016-06-09	HR	T2	Swim	5	72.3	1.22	3.22808
2016-06-09	HR	T2	Swim	6	84	2.68	4.52165
2016-06-09	HR	T2	Swim	7	84	2.82	4.75786
2016-06-09	HR	T2	Swim	8	75.1	1.78	4.20243
2016-06-09	HR	T3	Swim	1	95.4	4.04	4.65303
2016-06-09	HR	T3	Swim	2	89.9	3.26	4.48682
2016-06-09	HR	T3	Swim	3	75.5	1.99	4.62394
2016-06-09	HR	T3	Swim	4	76.8	1.96	4.32686
2016-06-09	HR	T3	Swim	5	85	2.66	4.33137
2016-06-09	HR	T3	Swim	6	89.1	3.1	4.38257
2016-06-09	HR	T3	Swim	7	75.9	1.99	4.55122
2016-06-09	HR	T3	Swim	8	80.9	2.3	4.34392
2016-06-09	LR	T4	Swim	1	73.2	1.56	3.97733
2016-06-09	LR	T4	Swim	2	65.6	1.12	3.9674
2016-06-09	LR	T4	Swim	3	81	2.03	3.8198
2016-06-09	LR	T4	Swim	4	84.1	2.61	4.38786
2016-06-09	LR	T4	Swim	5	67.7	1.36	4.38301
2016-06-09	LR	T4	Swim	6	76.4	2.13	4.77639
2016-06-09	LR	T4	Swim	7	70.6	1.48	4.20579
2016-06-09	LR	T4	Swim	8	80.7	2.19	4.167
2016-06-09	LR	T4	Swim	9	70.4	1.31	3.75451
2016-06-09	LR	T4	Swim	10	83.8	2.43	4.12928
2016-06-09	LR	T4	Swim	11	86.1	2.62	4.1048
2016-06-09	LR	T4	Swim	12	73.6	1.75	4.38939
2016-06-09	LR	T4	Swim	13	70.3	1.29	3.71299
2016-06-09	LR	T5	Swim	1	68	1.47	4.6751
2016-06-09	LR	T5	Swim	2	80.6	1.94	3.70507
2016-06-09	LR	T5	Swim	3	71.6	1.29	3.5144
2016-06-09	LR	T5	Swim	4	76.1	1.78	4.03893
2016-06-09	LR	T5	Swim	5	75.7	1.67	3.84972
2016-06-09	LR	T5	Swim	6	78.9	1.87	3.80724
2016-06-09	LR	T5	Swim	7	68.8	1.2	3.68482
2016-06-09	LR	T5	Swim	8	78.5	1.95	4.03112
2016-06-09	LR	T5	Swim	9	75.1	1.57	3.70664
2016-06-09	LR	T5	Swim	10	74.8	1.48	3.53636
2016-06-09	LR	T5	Swim	11	66.3	1.18	4.04894
2016-06-09	LR	T5	Swim	12	79.5	1.77	3.52267
2016-06-09	LR	T6	Swim	1	77.4	1.96	4.22701
2016-06-09	LR	T6	Swim	2	66.1	1.2	4.15506
2016-06-09	LR	T6	Swim	3	81	2.35	4.42194
2016-06-09	LR	T6	Swim	4	75.3	1.82	4.26272
2016-06-09	LR	T6	Swim	5	79.7	2.3	4.54311
2016-06-09	LR	T6	Swim	6	67.4	1.17	3.82126
2016-06-09	LR	T6	Swim	7	68.9	1.39	4.24969
2016-06-09	LR	T6	Swim	8	61.8	0.72	3.05047
2016-06-30	HR	T1	Sleep	1	80.2	1.75	3.39246
2016-06-30	HR	T1	Sleep	2	97.5	4.03	4.34802
2016-06-30	HR	T1	Sleep	3	84.5	2.58	4.27612
2016-06-30	HR	T1	Sleep	4	82.9	2.52	4.4232
2016-06-30	HR	T1	Sleep	5	83.8	2.23	3.78942
2016-06-30	HR	T1	Sleep	6	80.6	2.16	4.12523
2016-06-30	HR	T1	Sleep	7	88.1	3.04	4.44576
2016-06-30	HR	T1	Sleep	8	73.1	1.5	3.84007
2016-06-30	HR	T1	Sleep	9	76.7	2.04	4.5211
2016-06-30	HR	T1	Sleep	10	75.5	1.82	4.22893
2016-06-30	HR	T1	Sleep	11	68.5	1.08	3.3601
2016-06-30	HR	T1	Sleep	12	82.3	1.91	3.42637
2016-06-30	HR	T1	Sleep	13	80.9	1.49	2.81411
2016-06-30	HR	T2	Swim	1	97.6	4.59	4.937
2016-06-30	HR	T2	Swim	2	83.2	2.43	4.21926
2016-06-30	HR	T2	Swim	3	96.1	4.05	4.56336
2016-06-30	HR	T2	Swim	4	75.9	2.08	4.75705
2016-06-30	HR	T2	Swim	5	77.69	2.14	4.56371
2016-06-30	HR	T2	Swim	6	71.8	1.46	3.94439
2016-06-30	HR	T2	Swim	7	93	3.62	4.50049
2016-06-30	HR	T2	Swim	8	87.3	2.66	3.99796
2016-06-30	HR	T2	Swim	9	84.2	2.82	4.72403
2016-06-30	HR	T2	Sleep	1	96.2	4.66	5.23433
2016-06-30	HR	T2	Sleep	2	80	2.24	4.375
2016-06-30	HR	T2	Sleep	3	70.8	1.6	4.50838
2016-06-30	HR	T2	Sleep	4	87.7	2.88	4.26966
2016-06-30	HR	T2	Sleep	5	79.7	1.78	3.51597
2016-06-30	HR	T2	Sleep	6	101.7	4.74	4.50625
2016-06-30	HR	T2	Sleep	7	97.1	3.6	3.93228
2016-06-30	HR	T2	Sleep	8	93.4	3.73	4.57792
2016-06-30	HR	T2	Sleep	9	79.5	1.87	3.72169
2016-06-30	HR	T2	Sleep	10	89.9	3.38	4.65198
2016-06-30	HR	T2	Sleep	11	87.2	3.17	4.7809
2016-06-30	HR	T2	Sleep	12	86	3.1	4.87378
2016-06-30	HR	T2	Sleep	13	87.6	3.03	4.50744
2016-06-30	HR	T3	Sleep	1	77.8	1.64	3.48261
2016-06-30	HR	T3	Sleep	2	86.7	2.72	4.17361
2016-06-30	HR	T3	Sleep	3	77.2	2.03	4.41209
2016-06-30	HR	T3	Sleep	4	84.8	2.42	3.96851
2016-06-30	HR	T3	Sleep	5	84.7	2.77	4.55858
2016-06-30	HR	T3	Sleep	6	75.5	2	4.64718
2016-06-30	HR	T3	Sleep	7	84.4	2.41	4.00857
2016-06-30	HR	T3	Sleep	8	76.5	1.98	4.42263
2016-06-30	HR	T3	Sleep	9	90.9	3.26	4.34036
2016-06-30	HR	T3	Sleep	10	65.1	1.36	4.92942
2016-06-30	HR	T3	Sleep	11	79.4	2.24	4.47493
2016-06-30	HR	T3	Sleep	12	91.5	3.54	4.62104
2016-06-30	HR	T3	Sleep	13	83.4	2.25	3.87868
2016-06-30	HR	T3	Sleep	14	94.6	2.93	3.46094
2016-06-30	HR	T3	Sleep	15	82.6	2.45	4.34736
2016-06-30	HR	T3	Sleep	16	82.7	2.32	4.10177
2016-06-30	HR	T3	Sleep	17	68.8	1.13	3.46987
2016-06-30	LR	T4	Swim	1	66.6	1.12	3.79136
2016-06-30	LR	T4	Swim	2	84.6	2.38	3.93066
2016-06-30	LR	T4	Swim	3	82	2.51	4.55231
2016-06-30	LR	T4	Swim	4	75	1.74	4.12444
2016-06-30	LR	T4	Swim	5	72.6	1.79	4.67782
2016-06-30	LR	T4	Swim	6	70.6	1.43	4.0637
2016-06-30	LR	T4	Swim	7	73.4	1.8	4.55181
2016-06-30	LR	T4	Swim	8	85.6	2.79	4.44819
2016-06-30	LR	T4	Swim	9	72.8	1.57	4.06917
2016-06-30	LR	T4	Swim	10	81.1	2.42	4.53683
2016-06-30	LR	T4	Swim	11	78.7	2.18	4.47231
2016-06-30	LR	T4	Swim	12	76.2	2.18	4.9271
2016-06-30	LR	T4	Swim	13	67.1	1.41	4.66715
2016-06-30	LR	T4	Swim	14	79.2	2.33	4.69008
2016-06-30	LR	T4	Swim	15	77	1.89	4.1399
2016-06-30	LR	T4	Swim	16	89.5	2.87	4.00325
2016-06-30	LR	T4	Swim	17	78.5	2.15	4.44457
2016-06-30	LR	T4	Swim	18	81.2	2.39	4.46406
2016-06-30	LR	T4	Swim	19	71	1.38	3.85571
2016-06-30	LR	T4	Sleep	1	76.1	1.75	3.97086
2016-06-30	LR	T4	Sleep	2	74.8	1.51	3.60805
2016-06-30	LR	T4	Sleep	3	87.8	3.09	4.56536
2016-06-30	LR	T4	Sleep	4	67.1	1.2	3.97204
2016-06-30	LR	T4	Sleep	5	83.5	2.91	4.99843
2016-06-30	LR	T4	Sleep	6	84.1	2.49	4.18612
2016-06-30	LR	T4	Sleep	7	76.7	1.66	3.67893
2016-06-30	LR	T4	Sleep	8	80	2.36	4.60937
2016-06-30	LR	T4	Sleep	9	68.5	1.51	4.69792
2016-06-30	LR	T4	Sleep	10	77.5	1.84	3.95287
2016-06-30	LR	T4	Sleep	11	87.7	2.24	3.32085
2016-06-30	LR	T4	Sleep	12	78.4	1.6	3.32026
2016-06-30	LR	T4	Sleep	13	74.2	1.65	4.03898
2016-06-30	LR	T5	Swim	1	88.6	2.12	3.04814
2016-06-30	LR	T5	Swim	2	76.5	1.99	4.44497
2016-06-30	LR	T5	Swim	3	77.7	1.91	4.07165
2016-06-30	LR	T5	Swim	4	72.7	0.96	2.49843
2016-06-30	LR	T5	Swim	5	65.1	0.94	3.4071
2016-06-30	LR	T5	Swim	6	79.1	1.97	3.98049
2016-06-30	LR	T5	Swim	7	59.6	0.88	4.15665
2016-06-30	LR	T5	Swim	8	69.6	1.24	3.67785
2016-06-30	LR	T5	Swim	9	70.1	1.2	3.48359
2016-06-30	LR	T5	Swim	10	61.2	0.84	3.66459
2016-06-30	LR	T5	Swim	11	73.6	1.66	4.16365
2016-06-30	LR	T5	Swim	12	71.1	1.52	4.22897
2016-06-30	LR	T5	Swim	13	78.3	2.21	4.6037
2016-06-30	LR	T5	Swim	14	75.6	2.07	4.79077
2016-06-30	LR	T5	Swim	15	87	2.83	4.29763
2016-06-30	LR	T5	Swim	16	76.9	1.82	4.00214
2016-06-30	LR	T5	Swim	17	76.3	1.59	3.57951
2016-06-30	LR	T5	Swim	18	70	1.42	4.13994
2016-06-30	LR	T5	Swim	19	71.6	1.32	3.59613
2016-06-30	LR	T5	Swim	20	76.6	1.96	4.36084
2016-06-30	LR	T5	Sleep	1	88	2.82	4.1381
2016-06-30	LR	T5	Sleep	2	80.7	1.74	3.31077
2016-06-30	LR	T5	Sleep	3	60.9	0.83	3.67474
2016-06-30	LR	T5	Sleep	4	67.3	1.07	3.51025
2016-06-30	LR	T5	Sleep	5	77.4	1.72	3.70942
2016-06-30	LR	T5	Sleep	6	76.7	1.79	3.96704
2016-06-30	LR	T5	Sleep	7	72.6	1.59	4.15516
2016-06-30	LR	T5	Sleep	8	84.9	2.06	3.36623
2016-06-30	LR	T5	Sleep	9	86.4	2.71	4.20173
2016-06-30	LR	T5	Sleep	10	74.4	1.46	3.54515
2016-06-30	LR	T6	Swim	1	78.6	1.89	3.89219
2016-06-30	LR	T6	Swim	2	81.2	2.49	4.65084
2016-06-30	LR	T6	Swim	3	82.7	2.41	4.26089
2016-06-30	LR	T6	Swim	4	79.7	2.23	4.40484
2016-06-30	LR	T6	Swim	5	77.1	1.9	4.14563
2016-06-30	LR	T6	Swim	6	76.6	1.95	4.33859
2016-06-30	LR	T6	Swim	7	82.5	2.46	4.381
2016-06-30	LR	T6	Swim	8	74.6	1.68	4.04662
2016-06-30	LR	T6	Sleep	1	79.8	1.96	3.85698
2016-06-30	LR	T6	Sleep	2	87.8	3	4.43239
2016-06-30	LR	T6	Sleep	3	80.9	2.36	4.45724
2016-06-30	LR	T6	Sleep	4	69.2	1.2	3.62129
2016-06-30	LR	T6	Sleep	5	70.5	1.22	3.48171
2016-06-30	LR	T6	Sleep	6	71.2	1.5	4.15577
2016-06-30	LR	T6	Sleep	7	80.6	2.57	4.90826
2016-06-30	LR	T6	Sleep	8	80.3	2.32	4.48065
2016-06-30	LR	T6	Sleep	9	73.3	1.61	4.08803
2016-06-30	LR	T6	Sleep	10	73	1.69	4.34428
2016-06-30	LR	T6	Sleep	11	76.5	1.73	3.86422

## Sheet: WaterTemperature
Date	Days	WT
2016-04-20	0
2016-04-21	1
2016-04-22	2
2016-04-23	3
2016-04-24	4
2016-04-25	5
2016-04-26	6
2016-04-27	7
2016-04-28	8	14.8216
2016-04-29	9	14.754
2016-04-30	10	15.0448
2016-05-01	11	15.5986
2016-05-02	12	15.7
2016-05-03	13	15.5723
2016-05-04	14	15.7645
2016-05-05	15	15.9267
2016-05-06	16	15.5319
2016-05-07	17	15.8124
2016-05-08	18	15.9306
2016-05-09	19	15.7803
2016-05-10	20	15.8702
2016-05-11	21	16.1344
2016-05-12	22	16.1337
2016-05-13	23	16.4797
2016-05-14	24	16.8182
2016-05-15	25	17.0021
2016-05-16	26	16.9229
2016-05-17	27	16.7724
2016-05-18	28	17.3404
2016-05-19	29	17.5761
2016-05-20	30	17.4724
2016-05-21	31	17.6212
2016-05-22	32	17.6683
2016-05-23	33	17.8551
2016-05-24	34	17.861
2016-05-25	35	17.8335
2016-05-26	36	18.0449
2016-05-27	37	18.3207
2016-05-28	38	18.2072
2016-05-29	39	18.1286
2016-05-30	40	18.5595
2016-05-31	41	18.7027
2016-06-01	42	18.7474
2016-06-02	43	18.6968
2016-06-03	44	18.8529
2016-06-04	45	18.7537
2016-06-05	46	18.6145
2016-06-06	47	19.0336
2016-06-07	48	19.0927
2016-06-08	49	19.696
2016-06-09	50	20.3478
2016-06-10	51	19.896
2016-06-11	52	20.1727
2016-06-12	53	20.1444
2016-06-13	54	20.1935
2016-06-14	55	20.7262
2016-06-15	56	21.0567
2016-06-16	57	20.9503
2016-06-17	58	20.9002
2016-06-18	59	20.8562
2016-06-19	60	20.7571
2016-06-20	61	20.777
2016-06-21	62	20.864
2016-06-22	63	20.7815
2016-06-23	64	21.0731
2016-06-24	65	20.9581
2016-06-25	66	20.9052
2016-06-26	67	20.7691
2016-06-27	68	20.6063
2016-06-28	69	20.51
2016-06-29	70	20.5202
2016-06-30	71	20.6113

## Sheet: DataFig1
SL	Mean		SD
	HR	LR	HR	LR
2016-04-28	70.7391	70.7391	6.73823	6.73823
2016-05-19	77.2414	74.0581	6.5746	6.87274
2016-06-09	81.0375	74.3939	6.99085	6.17231
2016-06-30	83.5537	76.5642	8.24822	6.5893
BW	Mean		SD
	HR	LR	HR	LR
2016-04-28	1.1653	1.1653	0.368264	0.368264
2016-05-19	1.90276	1.43774	0.610187	0.460693
2016-06-09	2.38167	1.69576	0.697285	0.467814
2016-06-30	2.56212	1.88333	0.894467	0.545557
K	Mean		SD
	HR	LR	HR	LR
2016-04-28	3.19532	3.19532	0.347519	0.347519
2016-05-19	3.98991	3.42154	0.43824	0.458992
2016-06-09	4.35546	4.01902	0.394971	0.370771
2016-06-30	4.22984	4.0854	0.491258	0.465903
