# Supplementary material for: Food availability before aestivation governs growth and winter reproductive potential in the capital breeding fish, Ammodytes japonicus
Source: PLoS One. 2019 Mar 7;14(3):e0213611. doi: 10.1371/journal.pone.0213611 (PMC6405122; doi:10.1371/journal.pone.0213611)
Supplement: S2 Dataset — (XLSX) [file pone.0213611.s002.xlsx]

## Sheet: Measurements
Date	Group	No	SL	BW	K	Maturity	Sex
2016-07-14	HR	1	101.9	5.53	5.2264	0	Immature
2016-07-14	HR	2	98.4	4.69	4.92252	0	Immature
2016-07-14	HR	3	91.2	4.01	5.2864	0	Immature
2016-07-14	HR	4	86.5	3.52	5.43869	0	Immature
2016-07-14	HR	5	96.6	5.11	5.66878	0	Immature
2016-07-14	HR	6	121.9	9.42	5.20044	0	Immature
2016-07-14	HR	7	96.6	4.97	5.51347	0	Immature
2016-07-14	HR	8	96.4	4.8	5.35809	0	Immature
2016-07-14	HR	9	90.6	3.99	5.36523	0	Immature
2016-07-14	HR	10	109.2	6.82	5.23741	0	Immature
2016-07-14	HR	11	94	4.55	5.47807	0	Immature
2016-07-14	HR	12	101.1	5.94	5.74821	0	Immature
2016-07-14	HR	13	85.4	3.2	5.13779	0	Immature
2016-07-14	HR	14	91.5	4.11	5.36511	0	Immature
2016-07-14	HR	15	96.3	4.58	5.12846	0	Immature
2016-07-14	HR	16	92.3	4.32	5.49387	0	Immature
2016-07-14	HR	17	95.7	4.38	4.99733	0	Immature
2016-07-14	HR	18	83.5	2.52	4.32854	0	Immature
2016-07-14	HR	19	94.3	4.18	4.98472	0	Immature
2016-07-14	HR	20	98.4	5.29	5.55227	0	Immature
2016-07-14	HR	21	110.4	6.8	5.05361	0	Immature
2016-07-14	HR	22	101.7	5.08	4.82949	0	Immature
2016-07-14	HR	23	108.5	6.81	5.3316	0	Immature
2016-07-14	HR	24	97.6	5.2	5.59312	0	Immature
2016-07-14	HR	25	108.9	6.47	5.0098	0	Immature
2016-07-14	HR	26	85	3.04	4.95013	0	Immature
2016-07-14	HR	27	103.9	6.03	5.37614	0	Immature
2016-07-14	HR	28	103.5	5.31	4.78932	0	Immature
2016-07-14	HR	29	99.1	5.05	5.18884	0	Immature
2016-07-14	HR	30	98.9	4.89	5.05499	0	Immature
2016-07-14	LR	1	73.7	1.84	4.59637	0	Immature
2016-07-14	LR	2	94.6	3.86	4.55947	0	Immature
2016-07-14	LR	3	73.7	1.98	4.9461	0	Immature
2016-07-14	LR	4	68.3	1.37	4.2999	0	Immature
2016-07-14	LR	5	79.3	1.84	3.68976	0	Immature
2016-07-14	LR	6	83.7	2.33	3.97356	0	Immature
2016-07-14	LR	7	83.6	2.43	4.15899	0	Immature
2016-07-14	LR	8	70.5	1.48	4.22371	0	Immature
2016-07-14	LR	9	76	2.1	4.78386	0	Immature
2016-07-14	LR	10	84.7	2.86	4.70669	0	Immature
2016-07-14	LR	11	69.6	1.43	4.24139	0	Immature
2016-07-14	LR	12	72.7	1.66	4.32021	0	Immature
2016-07-14	LR	13	77.4	2.16	4.65834	0	Immature
2016-07-14	LR	14	81.9	2.33	4.24135	0	Immature
2016-07-14	LR	15	76.9	2.14	4.70581	0	Immature
2016-07-14	LR	16	69.5	1.29	3.84269	0	Immature
2016-07-14	LR	17	78.4	1.73	3.59003	0	Immature
2016-07-14	LR	18	71.9	1.75	4.70816	0	Immature
2016-07-14	LR	19	86.9	3.24	4.93726	0	Immature
2016-07-14	LR	20	78.4	2.09	4.33709	0	Immature
2016-07-14	LR	21	70.8	1.51	4.25478	0	Immature
2016-07-14	LR	22	84.5	2.53	4.19325	0	Immature
2016-07-14	LR	23	78.3	1.87	3.89544	0	Immature
2016-07-14	LR	24	67.5	1.32	4.29203	0	Immature
2016-07-14	LR	25	82.9	2.73	4.7918	0	Immature
2016-07-14	LR	26	73	1.7	4.36999	0	Immature
2016-07-14	LR	27	72.1	1.55	4.13548	0	Immature
2016-07-14	LR	28	75.1	1.75	4.1316	0	Immature
2016-07-14	LR	29	80.2	2.52	4.88514	0	Immature
2016-07-14	LR	30	70.9	1.43	4.01234	0	Immature
2018-11-16	HR	1	106.938	4.34	3.54891	0	Immature
2018-11-16	HR	2	108.067	4.29	3.39923	0	Immature
2018-11-16	HR	3	105.15	4.9	4.21468	1	F
2018-11-16	HR	4	108.255	4.64	3.65742	0	Immature
2018-11-16	HR	5	91.9791	3.32	4.26649	0	Immature
2018-11-16	HR	6	92.2614	2.52	3.20879	1	M
2018-11-16	HR	7	90.0975	2.6	3.55496	1	M
2018-11-16	HR	8	92.6377	2.83	3.55978	1	M
2018-11-30	HR	1	117.4	6.28	3.8811	1	M
2018-11-30	HR	2	105.9	4.4	3.7048	1	M
2018-11-30	HR	3	103.3	3.99	3.61969	1	M
2018-11-30	HR	4	100.3	4.2	4.16243	1	F
2018-11-30	HR	5	99.8	4.29	4.31584	0	Immature
2018-11-30	HR	6	106.4	4.93	4.09281	1	M
2018-11-30	HR	7	97.4	4.01	4.33978	0	Immature
2018-11-30	HR	8	83.3	2.14	3.70236	1	F
2018-11-30	HR	9	90.9	1.75	2.32995	0	Immature
2018-11-30	HR	10	73.4	1.16	2.93339	0	Immature
2018-12-12	HR	1	103.9	4.053	3.61352	1	M
2018-12-12	HR	2	98.8	3.788	3.92771	1	M
2018-12-12	HR	3	102	3.955	3.72688	1	M
2018-12-12	HR	4	101.9	4.105	3.87963	1	M
2018-12-12	HR	5	101.5	4.045	3.8683	1	M
2018-12-12	HR	6	94.5	3.029	3.58925	1	F
2018-12-12	HR	7	103.9	2.79	2.48747	1	F
2018-12-12	HR	8	95.1	3.193	3.71242	1	F
2018-12-12	HR	9	90	2.566	3.51989	1	M
2018-12-12	HR	10	90.2	2.832	3.85899	1	F
2018-12-12	HR	11	85.5	2.029	3.24626	1	F
2018-12-12	HR	12	86.5	1.956	3.02218	1	F
2018-12-12	HR	13	88.1	2.372	3.46886	1	F
2018-12-12	HR	14	87.1	1.773	2.68321	1	M
2018-12-12	HR	15	73.7	1.496	3.73705	1	F
2018-12-12	HR	16	81.5	1.576	2.91128	1	F
2018-12-12	HR	17	78.3	1.424	2.96637	1	M
2018-12-12	HR	18	77.4	1.441	3.10771	1	M
2018-12-12	HR	19	79.2	1.086	2.18602	1	M
2018-12-26	HR	1	113	4.926	3.41397	1	M
2018-12-26	HR	2	103.3	3.987	3.61697	1	M
2018-12-26	HR	3	114.1	5.772	3.8857	1	M
2018-12-26	HR	4	99.4	3.484	3.54747	1	F
2018-12-26	HR	5	91.8	2.376	3.07127	1	M
2018-12-26	HR	6	106.6	3.973	3.2798	1	M
2018-12-26	HR	7	103.5	3.142	2.8339	1	M
2018-12-26	HR	8	91.4	2.643	3.46145	1	F
2018-12-26	HR	9	98.4	3.023	3.17287	1	F
2018-12-26	HR	10	100.9	3.697	3.59895	1	M
2018-12-26	HR	11	85.3	2.373	3.82341	1	M
2018-12-26	HR	12	84.9	1.579	2.58023	1	F
2018-12-26	HR	13	83.1	1.736	3.02515	1	F
2018-12-26	HR	14	86.2	1.94	3.02887	1	M
2018-12-26	HR	15	83.5	1.621	2.78435	1	M
2018-12-26	HR	16	71.9	0.986	2.65271	1	F
2018-01-11	HR	1	105.64	3.66	3.10453	1	F
2018-01-11	HR	2	115.52	5.36	3.47691	1	F
2018-01-11	HR	3	92.41	2.56	3.24402	1	F
2018-01-11	HR	4	97.48	2.72	2.93645	1	F
2018-01-11	HR	5	109.39	4.76	3.63642	1	M
2018-01-11	HR	6	104.67	4.24	3.69742	1	M
2018-01-11	HR	7	99.92	3.5	3.50841	1	M
2018-01-11	HR	8	91.21	2.62	3.45282	1	F
2018-01-11	HR	9	96.71	2.81	3.10665	1	F
2018-01-11	HR	10	91.52	2.36	3.07868	1	F
2018-01-11	HR	11	98.68	3.05	3.17404	1	M
2018-01-11	HR	12	89.06	2.45	3.46831	1	M
2018-01-11	HR	13	86.72	2	3.06671	1	F
2018-01-11	HR	14	86.21	1.78	2.77809	1	F
2018-01-11	HR	15	81.38	1.55	2.87593	1	F
2018-11-16	LR	1	82.3	1.97	3.534	0	Immature
2018-11-16	LR	2	80.2	1.47	2.84967	0	Immature
2018-11-16	LR	3	84	1.35	2.2777	0	Immature
2018-11-16	LR	4	73.5	1.26	3.17328	0	Immature
2018-11-16	LR	5	73.5	1.28	3.22365	0	Immature
2018-11-16	LR	6	76.8	1.38	3.04646	0	Immature
2018-11-16	LR	7	78.7	1.28	2.62595	0	Immature
2018-11-16	LR	8	79.1	1.59	3.21268	0	Immature
2018-11-16	LR	9	77.2	1.22	2.6516	0	Immature
2018-11-30	LR	1	87.5	2.42	3.61236	1	F
2018-11-30	LR	2	84.7	1.69	2.78123	0	Immature
2018-11-30	LR	3	69.5	0.81	2.41285	0	Immature
2018-11-30	LR	4	69.8	1	2.94058	0	Immature
2018-11-30	LR	5	69.6	1.06	3.14397	1	M
2018-11-30	LR	6	72.5	1.22	3.20144	0	Immature
2018-11-30	LR	7	74.4	0.91	2.20965	0	Immature
2018-11-30	LR	8	67.6	0.63	2.03939	0	Immature
2018-11-30	LR	9	64.9	0.8	2.92655	0	Immature
2018-11-30	LR	10	70.5	0.86	2.45432	0	Immature
2018-12-12	LR	1	74.4	1.255	3.04737	0	Immature
2018-12-12	LR	2	80.1	1.807	3.5161	1	F
2018-12-12	LR	3	84.5	1.809	2.99825	1	F
2018-12-12	LR	4	79	1.679	3.40541	1	M
2018-12-12	LR	5	82.1	1.52	2.74672	0	Immature
2018-12-12	LR	6	75	1.232	2.9203	1	M
2018-12-12	LR	7	77.3	1.701	3.6827	1	M
2018-12-12	LR	8	75.9	1.337	3.05778	1	F
2018-12-12	LR	9	69.3	0.992	2.98066	1	F
2018-12-12	LR	10	72.6	1.092	2.85373	0	Immature
2018-12-12	LR	11	68.6	0.83	2.57102	0	Immature
2018-12-12	LR	12	77.4	1.059	2.28388	0	Immature
2018-12-12	LR	13	68.9	0.811	2.47949	0	Immature
2018-12-12	LR	14	77.1	0.843	1.83935	0	Immature
2018-12-12	LR	15	78.1	0.893	1.87456	0	Immature
2018-12-26	LR	1	85.3	1.754	2.82607	1	F
2018-12-26	LR	2	83.3	1.655	2.86327	1	M
2018-12-26	LR	3	78.3	1.448	3.01636	1	F
2018-12-26	LR	4	76.6	1.272	2.83009	1	M
2018-12-26	LR	5	81.8	1.9	3.47131	1	F
2018-12-26	LR	6	79.3	1.438	2.88363	1	M
2018-12-26	LR	7	76.2	1.331	3.00824	1	M
2018-12-26	LR	8	84.9	1.557	2.54428	1	F
2018-12-26	LR	9	74.9	1.231	2.92963	1	M
2018-12-26	LR	10	80.8	1.272	2.41131	1	M
2018-12-26	LR	11	72.7	0.962	2.50364	1	F
2018-12-26	LR	12	79.4	0.909	1.81594	0	Immature
2018-12-26	LR	13	74.1	1.093	2.68637	1	M
2018-12-26	LR	14	73.1	1.149	2.94149	1	F
2018-12-26	LR	15	66.8	0.623	2.09006	0	Immature
2018-01-11	LR	1	86.32	1.54	2.39434	1	F
2018-01-11	LR	2	79.44	1.22	2.43356	1	F
2018-01-11	LR	3	76.2	1.23	2.77997	1	M
2018-01-11	LR	4	83.13	1.39	2.41959	1	F
2018-01-11	LR	5	84.14	1.43	2.40065	1	F
2018-01-11	LR	6	78.67	1.57	3.22457	1	M
2018-01-11	LR	7	79.38	1.14	2.27914	1	F
2018-01-11	LR	8	71.11	0.76	2.11359	1	M
2018-01-11	LR	9	72.33	0.8	2.11414	0	Immature
2018-01-11	LR	10	69.42	1.14	3.40762	1	F
2018-01-11	LR	11	73.04	0.95	2.43804	0	Immature
2018-01-11	LR	12	78.64	0.91	1.87116	1	F
2018-01-11	LR	13	71.61	0.73	1.98793	0	Immature

## Sheet: Fecundity
Group	SL	Fecundity	RelativeFecundity
HR	105.64	9718.3	3638.45
HR	115.52	16275	4452.8
HR	92.41	7614	3982.22
HR	97.48	6787.27	3188.01
HR	91.21	8196.65	4357.6
HR	96.71	8269.62	4108.11
HR	91.52	7478.11	4630.41
HR	86.72	4933.7	3197.47
HR	86.21	3907.23	2825.19
HR	81.38	4290.24	3507.96
HR	99.4	10052.6	3746.76
HR	91.4	6790.92	3378.57
HR	98.4	7574.66	3072.88
HR	84.9	3533.08	2664.47
HR	83.1	3669.51	2546.5
HR	71.9	1733.28	1976.37
LR	86.32	1502.07	1162.05
LR	79.44	2523.81	2415.13
LR	83.13	2577.67	2221.36
LR	84.14	2111.43	1672.55
LR	79.38	1787.63	1855.73
LR	69.42	2889.15	3138.67
LR	78.64	1111.44	1375.2
LR	85.3	3591.9	2386.64
LR	78.3	2062.01	1624.91
LR	81.8	4054.26	2430.61
LR	84.9	1531.43	1076.2
LR	72.7	1525	1815.48
LR	73.1	1999.55	2017.71
						分散	観測された分散比	有意 F
						68644.3	0.0857376	0.775117
						800632
						t	P-値	下限 95%	上限 95%	下限 95.0%	上限 95.0%
						0.288091	0.778633	-7421.25	9656.6	-7421.25	9656.6
						0.29281	0.775117	-92.6528	121.088	-92.6528	121.088
						分散	観測された分散比	有意 F
						1.5874e+08	111.101	4.84856e-08
						1.42879e+06
						t	P-値	下限 95%	上限 95%	下限 95.0%	上限 95.0%
						-7.98051	1.40889e-06	-28069.9	-16178.1	-28069.9	-16178.1
						10.5404	4.84856e-08	251.19	379.53	251.19	379.53
